# Supplementary material
Source: Royal Society of Chemistry journal article supplement (doi:10.1039/d6ee01805j)
Supplement: d6ee01805j1.pdf [file d6ee01805j1.pdf]

## Supplementary information

### Monitoring of electro–chemo–mechanics in Li metal electrodes by optical fibre sensors

Yanpeng Li<sup>1</sup>, Dengwei Lian<sup>2</sup>, Yi Qin<sup>1</sup>, Hongfei Lu<sup>1</sup>, Xiaohong Sun<sup>1</sup>, Yuhang Song<sup>1</sup>,  
Xin Jiang<sup>1</sup>, Hong Li<sup>3,4</sup>\*, Yang Jin<sup>1</sup>\*

<sup>1</sup> School of Electrical and Information Engineering, Zhengzhou University,  
Zhengzhou, 450001, China

<sup>2</sup> Contemporary Amperex Technology Co., Limited, Ningde, 352100, China

<sup>3</sup> Institute of Physics, Chinese Academy of Sciences, Beijing 100190, China

<sup>4</sup> Tianmu Lake Institute of Advanced Energy Storage Technologies Co., Ltd, Liyang  
213300, China

\*Corresponding authors: hli@iphy.ac.cn (H.L.), yangjin@zzu.edu.cn (Y.J.)

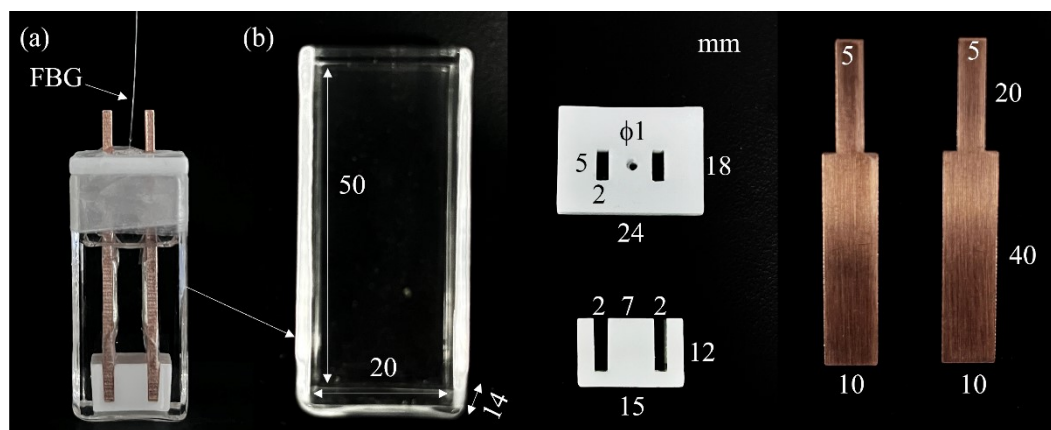

Figure S1 | (a) the assembled Li metal battery and (b) the structure parameters of customized fixture.

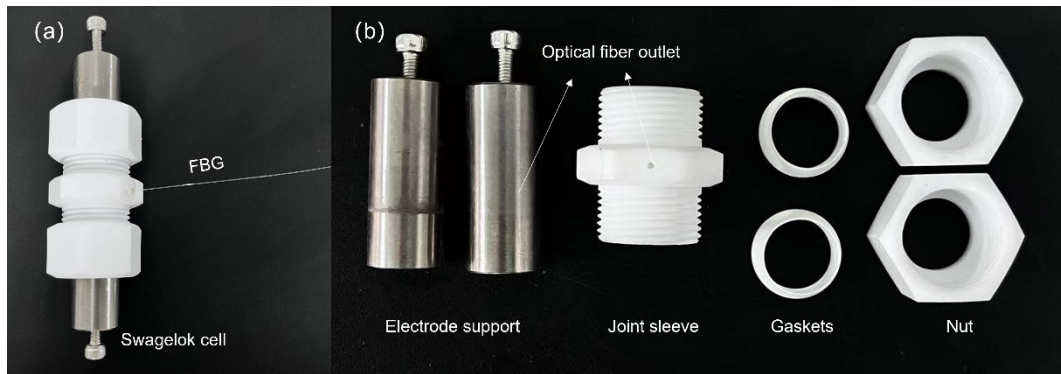

Figure S2 | (a) the assembled lithium titanate -lithium Swagelok cell and (b) its custom structural parts

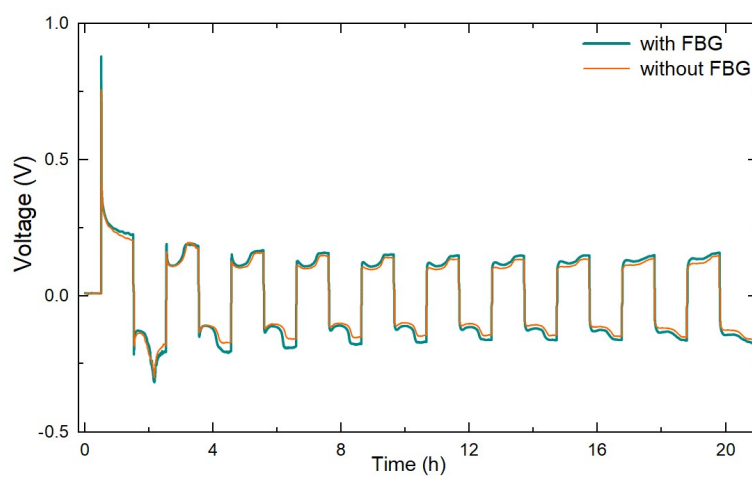

Figure S3 | The voltage curves of Li symmetrical cells with and without FBG

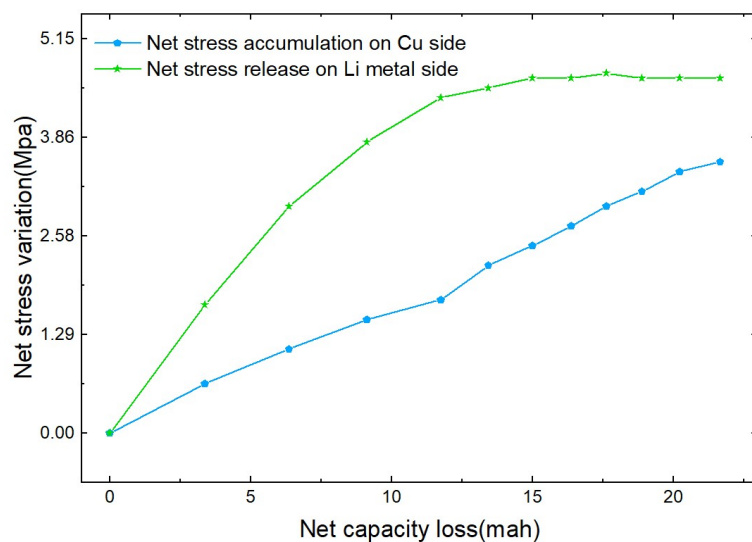

Figure S4 | The net stress variation on Cu side and Li metal side along with the Net capacity loss.

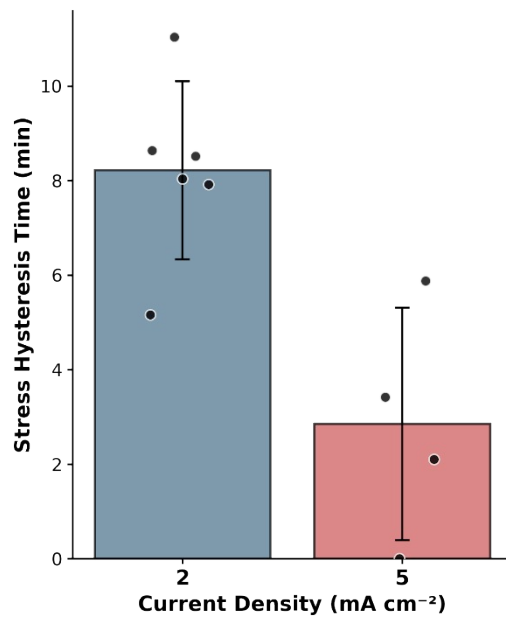

Figure S5 | The quantitative comparison between hysteresis time and current density.
